# Supplementary material for: Chitosan Catalyzed Novel Piperidinium Dicoumarol: Green Synthesis, X-ray Diffraction, Hirshfeld Surface and DFT Studies
Source: MDPI journal article supplement (doi:10.3390/polym14091854), 2022-04-30
Supplement: s1 [file s1]

# Supplementary Material: Chitosan Catalyzed Novel Piperidinium Dicoumarol: Green Synthesis, X-ray Diffraction, Hirshfeld Surface and DFT Studies

Mohammad Asad, Muhammad Nadeem Arshad, Mohammed Musthafa T. N. and Abdullah M. Asiri

Table S1. Bond Lengths for **4**.

| Atom | Atom | Length/Å | Atom | Atom | Length/Å |
|------|------|----------|------|------|----------|
| C1   | C21  | 1.514(3) | C15  | O2   | 1.376(3) |
| C1   | C3   | 1.523(3) | C15  | C16  | 1.378(3) |
| C1   | C12  | 1.524(3) | C16  | C17  | 1.362(4) |
| C2   | O4   | 1.215(2) | C17  | C18  | 1.380(4) |
| C2   | O1   | 1.385(2) | C18  | C19  | 1.378(3) |
| C2   | C3   | 1.439(3) | C20  | C21  | 1.335(3) |
| C3   | C4   | 1.379(3) | C20  | O3   | 1.359(2) |
| C4   | O8   | 1.301(2) | C21  | C22  | 1.458(3) |
| C4   | C5   | 1.471(3) | C22  | O6   | 1.232(2) |
| C5   | C10  | 1.383(3) | C22  | C23  | 1.464(3) |
| C5   | C6   | 1.386(3) | C23  | C24  | 1.378(3) |
| C6   | O1   | 1.365(2) | C23  | C28  | 1.401(3) |
| C6   | C7   | 1.400(3) | C24  | O3   | 1.373(2) |
| C7   | C8   | 1.375(3) | C24  | C25  | 1.387(3) |
| C8   | C9   | 1.375(3) | C25  | C26  | 1.366(3) |
| C9   | C10  | 1.370(3) | C26  | C27  | 1.383(4) |
| C11  | O5   | 1.216(3) | C27  | C28  | 1.368(3) |
| C11  | O2   | 1.372(2) | C29  | N1   | 1.480(5) |
| C11  | C12  | 1.434(3) | C29  | C30  | 1.487(4) |
| C12  | C13  | 1.361(3) | C30  | C31  | 1.504(5) |
| C13  | O7   | 1.318(2) | C31  | C32  | 1.501(4) |
| C13  | C14  | 1.460(3) | C32  | C33  | 1.487(4) |
| C14  | C15  | 1.368(3) | C33  | N1   | 1.456(4) |
| C14  | C19  | 1.389(3) |      |      |          |

Table S2. Bond Angles for **4**.

| 4   |    |     |            |     |     |     |            |
|-----|----|-----|------------|-----|-----|-----|------------|
| C21 | C1 | C3  | 117.43(16) | C14 | C15 | O2  | 121.26(18) |
| C21 | C1 | C12 | 110.63(15) | C14 | C15 | C16 | 122.0(2)   |
| C3  | C1 | C12 | 114.74(15) | O2  | C15 | C16 | 116.7(2)   |
| O4  | C2 | O1  | 113.70(18) | C17 | C16 | C15 | 119.1(3)   |
| O4  | C2 | C3  | 127.1(2)   | C16 | C17 | C18 | 120.5(2)   |
| O1  | C2 | C3  | 119.22(19) | C19 | C18 | C17 | 119.9(3)   |
| C4  | C3 | C2  | 120.27(19) | C18 | C19 | C14 | 120.2(3)   |
| C4  | C3 | C1  | 124.83(18) | C21 | C20 | O3  | 125.71(19) |
| C2  | C3 | C1  | 114.82(17) | C20 | C21 | C22 | 118.77(18) |
| O8  | C4 | C3  | 123.87(19) | C20 | C21 | C1  | 124.49(18) |
| O8  | C4 | C5  | 117.18(18) | C22 | C21 | C1  | 116.65(17) |
| C3  | C4 | C5  | 118.95(18) | O6  | C22 | C21 | 122.55(19) |
| C10 | C5 | C6  | 118.10(19) | O6  | C22 | C23 | 122.00(19) |

|     |     |     |            |     |     |     |            |
|-----|-----|-----|------------|-----|-----|-----|------------|
| C10 | C5  | C4  | 123.63(19) | C21 | C22 | C23 | 115.44(18) |
| C6  | C5  | C4  | 118.24(19) | C24 | C23 | C28 | 117.8(2)   |
| O1  | C6  | C5  | 122.00(19) | C24 | C23 | C22 | 120.38(19) |
| O1  | C6  | C7  | 116.1(2)   | C28 | C23 | C22 | 121.9(2)   |
| C5  | C6  | C7  | 121.9(2)   | O3  | C24 | C23 | 121.38(19) |
| C8  | C7  | C6  | 117.8(2)   | O3  | C24 | C25 | 116.3(2)   |
| C7  | C8  | C9  | 121.0(2)   | C23 | C24 | C25 | 122.4(2)   |
| C10 | C9  | C8  | 120.4(2)   | C26 | C25 | C24 | 118.3(2)   |
| C9  | C10 | C5  | 120.7(2)   | C25 | C26 | C27 | 120.9(2)   |
| O5  | C11 | O2  | 115.34(19) | C28 | C27 | C26 | 120.2(2)   |
| O5  | C11 | C12 | 125.59(19) | C27 | C28 | C23 | 120.4(2)   |
| O2  | C11 | C12 | 119.1(2)   | N1  | C29 | C30 | 111.8(3)   |
| C13 | C12 | C11 | 119.70(18) | C29 | C30 | C31 | 111.2(3)   |
| C13 | C12 | C1  | 125.19(18) | C32 | C31 | C30 | 109.6(3)   |
| C11 | C12 | C1  | 114.92(18) | C33 | C32 | C31 | 112.2(3)   |
| O7  | C13 | C12 | 124.07(17) | N1  | C33 | C32 | 111.2(3)   |
| O7  | C13 | C14 | 115.80(19) | C33 | N1  | C29 | 112.4(2)   |
| C12 | C13 | C14 | 120.13(19) | C6  | O1  | C2  | 121.13(17) |
| C15 | C14 | C19 | 118.3(2)   | C11 | O2  | C15 | 121.56(18) |
| C15 | C14 | C13 | 118.2(2)   | C20 | O3  | C24 | 118.25(16) |
| C19 | C14 | C13 | 123.5(2)   |     |     |     |            |

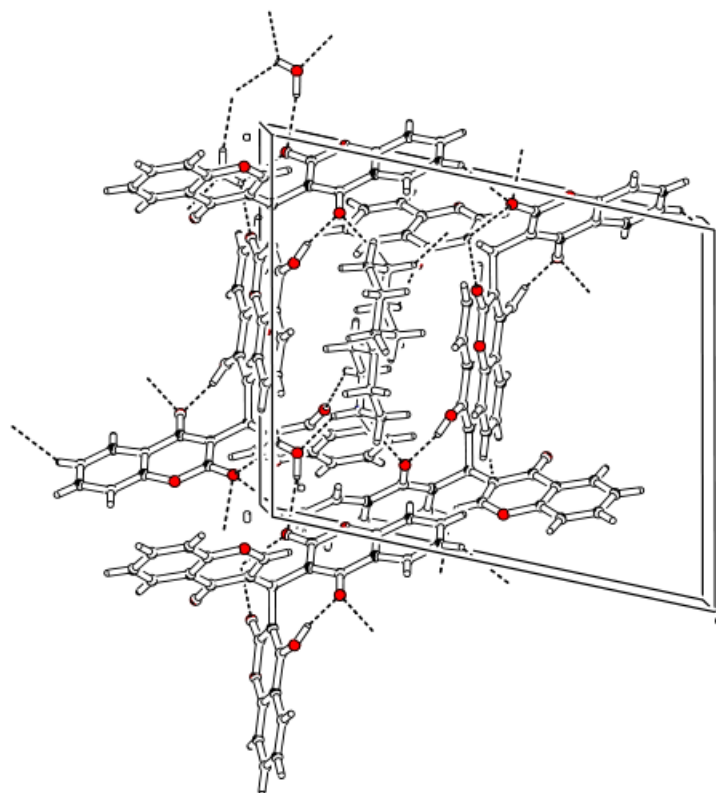

**Figure S1.** A unit cell diagram showing the hydrogen bonding interactions.

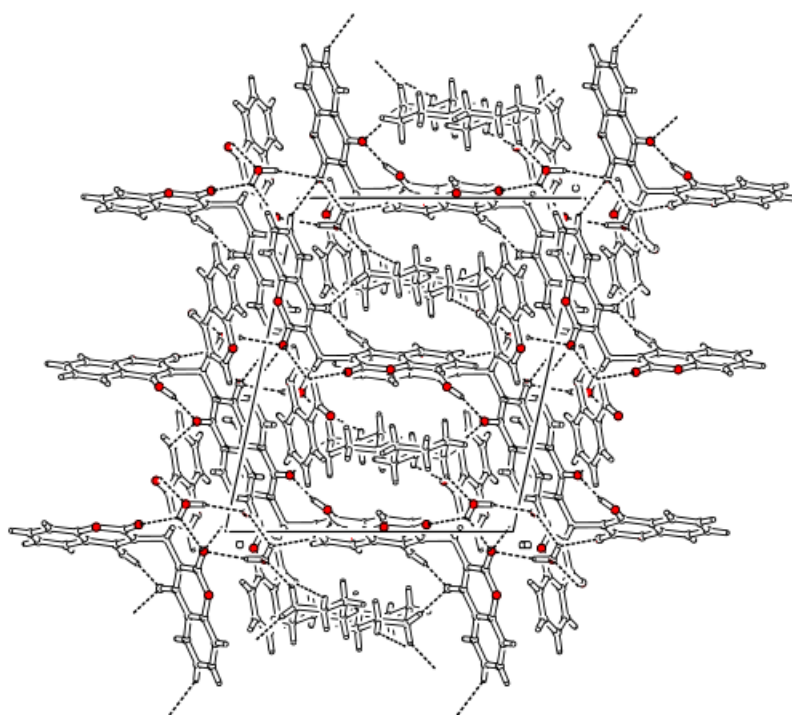

**Figure S2.** Packing diagram showing the formation of 3-dimensional network
